# Supplementary material
Source: PubMed Central journal article supplement (PMC1424667)
Supplement: NIHMS8594-supplement-movieleg.pdf [file NIHMS8594-supplement-movieleg.pdf]

## **Description of Movie files**

### **Cover Ca<sup>++</sup> video (Movie 1):**

Intracellular calcium increases evoked by 2MeSADP in microglia. Calcium increases are shown by using the calcium sensitive dye Fura-2 from Molecular Probes. The scale at the left side indicates the ratio of the fluorescent intensities at 340nm/380nm wavelengths. Higher ratios indicate higher levels of intracellular free calcium. 2MeSADP was applied twice at the times indicating by the appearance of “2MeSADP”. Total real time of this movie was 250 seconds. Movie is time compressed about 17 times.

### **Movement video (Movie 2):**

Time lapse video of movement evoked by application of 10  $\mu$ M ATP. ATP was applied at the time indicated by the occurrence of “ATP” in the lower left corner. Time in minutes is indicated in the lower right corner with negative time being before the application of ATP. Note the shape changes including movement, ruffling of edges, extension of filopodia, and overall flattening of cells.
